# Supplementary material for: Eating disorders in children and young people
Source: HighWire-hosted journal article supplement (doi:10.1136/bmj.j5245), 2017-12-07

# Eating disorders

Initial assessment in primary care

**Young person presents to primary care with suspected eating disorder**

- Eating disorders can affect men and women
- May present alone or with parent/guardian
- Parent/guardian may present alone with concerns

## Take history

**Ask about:** Changes in eating, Food eaten yesterday, Vomiting, Exercise, Repeated weighing or body checking, Preoccupation with weight and shape

Are they trying to lose weight? If so, what would be their ideal weight? Use of diet pills and laxatives

Stopping prescribed medicines, Suppressing hunger with caffeine, smoking, or excessive water drinking

Developing a therapeutic relationship is important:

Thank you for being brave enough to tell me about this

Be honest about the limits of confidentiality:

Can we think together about letting your parents know?

## Assess mental health and social functioning

- ⚠ Suicidal ideation/plans
- Anxiety, Depression
- Current stressors: School, Family, Peers, Abuse

## Examine for physiological consequences

|                                                                                                                                                                                                                              |                                                                                                                                           |                                                                                      |
|------------------------------------------------------------------------------------------------------------------------------------------------------------------------------------------------------------------------------|-------------------------------------------------------------------------------------------------------------------------------------------|--------------------------------------------------------------------------------------|
| <b>General physical appearance</b><br>Signs of malnourishment<br>Check hair and teeth, Dehydration<br>May appear well                                                                                                        | <b>Height and weight</b><br>May be less than minimally expected<br>⚠ Less than 75% weight for height<br>May be normal or increased        | <b>Skin</b><br>Pressure sores<br>Russell's sign                                      |
| <b>Cardiovascular</b><br>Slow pulse<br>⚠ <50 beats/min<br>⚠ Delayed capillary refill<br>⚠ Postural tachycardia<br>Decreased core temperature<br>Low blood pressure<br>⚠ <0.4 <sup>th</sup> centile<br>⚠ Postural hypotension | <b>Musculoskeletal</b><br>Muscle weakness<br>Sit/squat test fail<br>Back or bone pain<br>⚠ Spinal compression<br>⚠ Osteoporotic fractures | <b>Gastrointestinal</b><br>Tenderness<br>Constipation or ileus<br>⚠ Gastric dilation |

## Consider further investigations

look for signs of eating disorder or differential diagnoses

|                                                                                                                                         |                                                                                                         |
|-----------------------------------------------------------------------------------------------------------------------------------------|---------------------------------------------------------------------------------------------------------|
| <b>Full blood count</b><br>Anaemia, Thrombocytopenia, Neutropenia<br>⚠ If significant                                                   | <b>Urea and electrolytes</b><br>⚠ Hyponatraemia, ⚠ Hypokalaemia<br>Dehydration, Electrolyte disturbance |
| <b>Bone profile</b><br>⚠ Hypophosphataemia<br>Low calcium, magnesium, or phosphate                                                      | <b>ESR*</b><br>Possible organic cause, Bacterial infection                                              |
| <b>Blood glucose</b><br>⚠ Hypoglycaemia                                                                                                 | <b>Thyroid function tests</b><br>Hyperthyroidism                                                        |
| <b>ECG†</b><br>⚠ Cardiac arrhythmia<br>Prolonged QTc ⚠ >450 ms<br>Signs of electrolyte disturbance<br>Sinus bradycardia ⚠ <50 beats/min |                                                                                                         |

### Differential diagnosis

Alternative explanations for weight loss include:

- Diabetes, Coeliac disease, Hyperthyroidism, Malignancies

Eating disorders are associated with increased rates of other mental health disorders, including:

- Depression, Anxiety, Obsessive compulsive disorder, Alcohol misuse/dependence

## Management and referral

If you think they have an eating disorder, consider referral to a specialist child and adolescent eating disorder team. Most young people with eating disorders can be treated as outpatients. Signs and symptoms marked with ⚠ may require emergency treatment.

© 2017 BMJ Publishing group Ltd.  
 Disclaimer: This infographic is not a validated clinical decision aid. This information is provided without any representations, conditions, or warranties that it is accurate or up to date. BMJ and its licensors assume no responsibility for any aspect of treatment administered with the aid of this information. Any reliance placed on this information is strictly at the user's own risk. For the full disclaimer wording see BMJ's terms and conditions: <http://www.bmj.com/company/legal-information/>

\* ESR = Erythrocyte Sedimentation Rate † ECG = Electrocardiogram

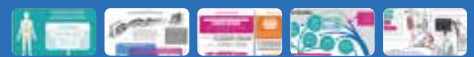

Supplement: eating_disorders_v18_web.pdf [file eating_disorders_v18_web.pdf]
